# Supplementary material for: Adsorption of lysozyme into a charged confining pore
Source: Royal Society of Chemistry journal article supplement (doi:10.1039/d1cp03185f), 2021-01-01
Supplement: d1cp03185f1.pdf [file d1cp03185f1.pdf]

## Supplementary Information

### Adsorption of Lysozyme Into a Charged Confining Pore

Daniel L. Z. Caetano,<sup>ab</sup> Ralf Metzler,<sup>c</sup> Andrey G. Cherstvy,<sup>cd</sup> and Sidney J. de Carvalho<sup>e</sup>

<sup>a</sup> *Institute of Chemistry, State University of Campinas (UNICAMP), Campinas, Brazil.*

<sup>b</sup> *Center for Computational Engineering and Sciences, State University of Campinas (UNICAMP), Campinas, Brazil.*

<sup>c</sup> *Institute for Physics & Astronomy, University of Potsdam, 14476 Potsdam-Golm, Germany.*

<sup>d</sup> *Institut für Physik, Humboldt-Universität zu Berlin, 12489 Berlin, Germany.*

<sup>e</sup> *Department of Physics, São Paulo State University (UNESP)  
Institute of Biosciences, Humanities and Exact Sciences  
São José do Rio Preto, Brazil. E-mail: sidney.carvalho@unesp.br*

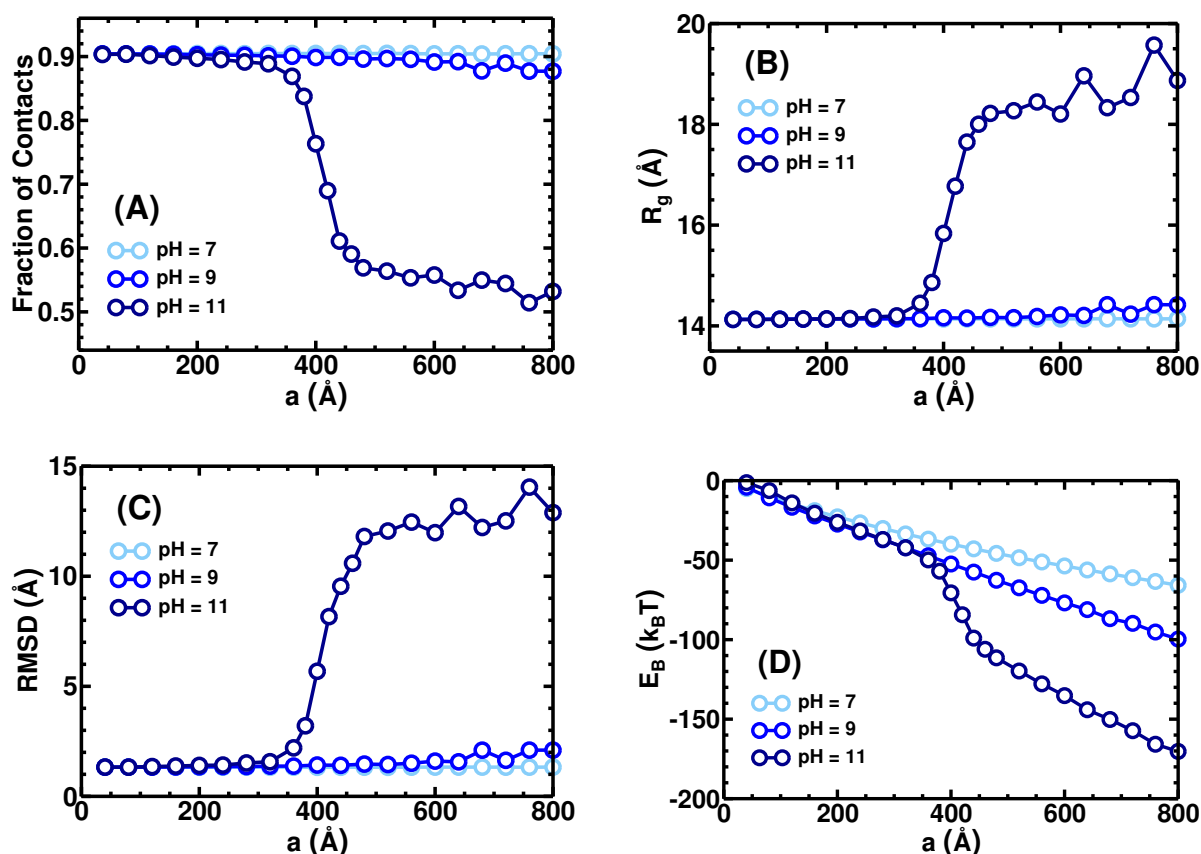

Figure S1: (A) Fraction of native contacts, (B) Mean radius of gyration,  $R_g$ , (C) Root-mean-square deviation, RMSD, and (D) Mean binding energy,  $E_B$ , of a single HEWL protein into a negatively charged pore as a function of the pore radius  $a$  for pH = 7 (light blue circles), pH = 9 (blue circles), and pH = 11 (dark blue circles). The salt concentration is 0.001 M. RMSD was calculated using the trajectories generated by the Monte Carlo simulations and the Python program `overlap.py`<sup>1</sup>.

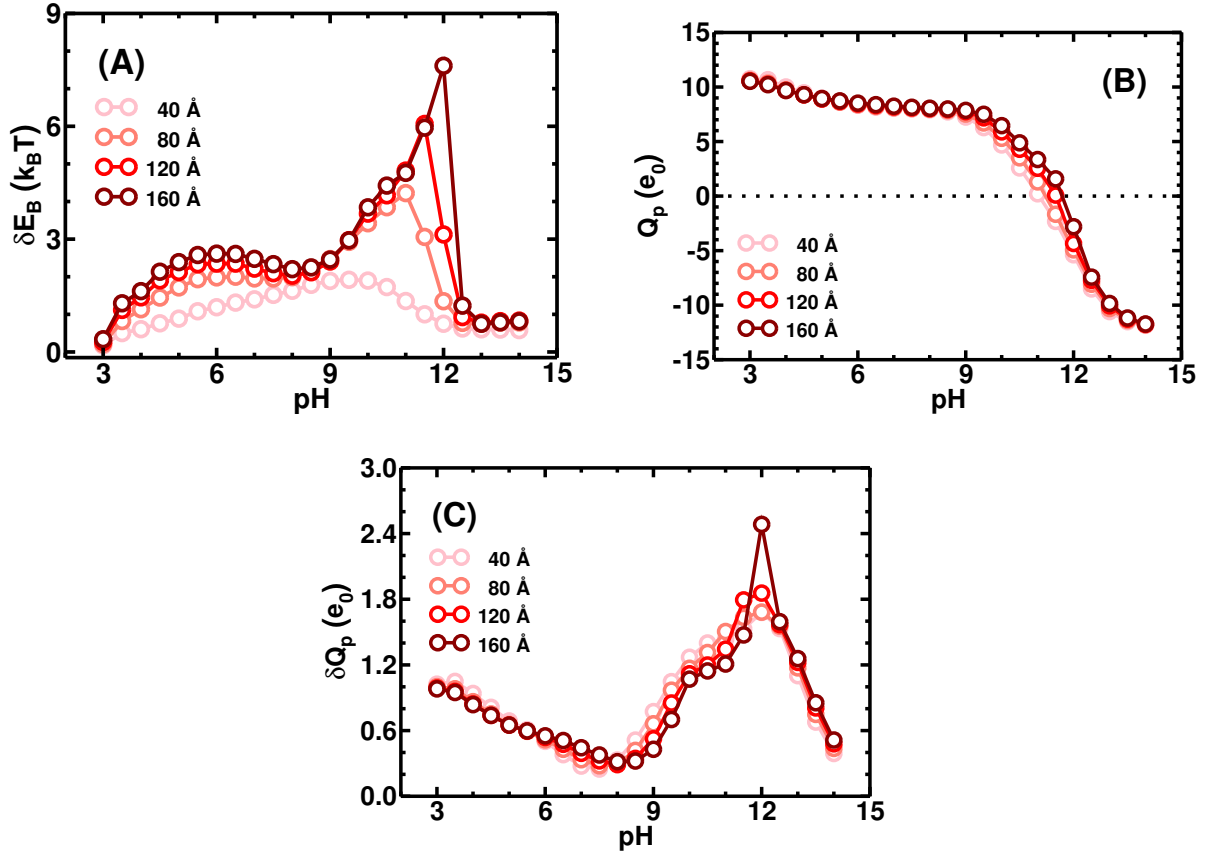

Figure S2: (A) Fluctuations of binding energy,  $\delta E_B$ , (B) Net charge,  $Q_p$  (in units of elementary charge  $e_0$ ), and (C) Fluctuations of net charge,  $\delta Q_p$ , of a single HEWL protein into a negatively charged pore as a function of pH for pore radius  $a = 40$  Å (pink circles), 80 Å (light red circles), 120 Å (red circles) and 160 Å (dark red circles). The salt concentration is 0.001 M.

Table S1: Hill coefficient  $n$  for all HEWL's basic residues at low salt concentration (0.001 M).

| Residue | $n$             |                 |                 |                 |                 |
|---------|-----------------|-----------------|-----------------|-----------------|-----------------|
|         | Free            | $a = 160$ Å     | $a = 120$ Å     | $a = 80$ Å      | $a = 40$ Å      |
| LYS1    | $0.68 \pm 0.01$ | $2.2 \pm 0.1$   | $1.8 \pm 0.1$   | $1.33 \pm 0.04$ | $1.06 \pm 0.01$ |
| ARG5    | $0.52 \pm 0.01$ | $1.32 \pm 0.06$ | $1.17 \pm 0.04$ | $1.07 \pm 0.01$ | $1.02 \pm 0.01$ |
| LYS13   | $0.57 \pm 0.01$ | $1.03 \pm 0.02$ | $1.01 \pm 0.02$ | $0.99 \pm 0.01$ | $0.97 \pm 0.01$ |
| ARG14   | $0.55 \pm 0.01$ | $1.08 \pm 0.02$ | $1.02 \pm 0.01$ | $0.99 \pm 0.01$ | $0.98 \pm 0.01$ |
| HIS15   | $0.93 \pm 0.01$ | $0.46 \pm 0.01$ | $0.52 \pm 0.01$ | $0.60 \pm 0.01$ | $0.72 \pm 0.01$ |
| ARG21   | $0.60 \pm 0.01$ | $1.04 \pm 0.01$ | $1.04 \pm 0.01$ | $1.04 \pm 0.01$ | $1.04 \pm 0.01$ |
| LYS33   | $0.56 \pm 0.01$ | $2.2 \pm 0.2$   | $1.8 \pm 0.1$   | $1.28 \pm 0.04$ | $1.03 \pm 0.01$ |
| ARG45   | $0.61 \pm 0.01$ | $1.19 \pm 0.04$ | $1.10 \pm 0.03$ | $1.04 \pm 0.01$ | $1.02 \pm 0.01$ |
| ARG61   | $0.50 \pm 0.01$ | $1.02 \pm 0.02$ | $0.97 \pm 0.01$ | $0.94 \pm 0.01$ | $0.97 \pm 0.01$ |
| ARG68   | $0.63 \pm 0.01$ | $1.08 \pm 0.02$ | $1.02 \pm 0.01$ | $0.99 \pm 0.01$ | $0.99 \pm 0.01$ |
| ARG73   | $0.59 \pm 0.01$ | $0.97 \pm 0.01$ | $0.94 \pm 0.01$ | $0.93 \pm 0.01$ | $0.96 \pm 0.01$ |
| LYS96   | $0.44 \pm 0.01$ | $0.91 \pm 0.03$ | $0.89 \pm 0.02$ | $0.85 \pm 0.01$ | $0.85 \pm 0.01$ |
| LYS97   | $0.49 \pm 0.01$ | $0.95 \pm 0.03$ | $0.92 \pm 0.02$ | $0.87 \pm 0.01$ | $0.87 \pm 0.01$ |
| ARG112  | $0.50 \pm 0.01$ | $1.28 \pm 0.05$ | $1.10 \pm 0.03$ | $0.97 \pm 0.01$ | $0.94 \pm 0.01$ |
| ARG114  | $0.50 \pm 0.01$ | $1.39 \pm 0.06$ | $1.18 \pm 0.05$ | $1.01 \pm 0.02$ | $0.95 \pm 0.01$ |
| LYS116  | $0.63 \pm 0.01$ | $1.1 \pm 0.1$   | $0.99 \pm 0.06$ | $0.99 \pm 0.02$ | $0.96 \pm 0.01$ |
| ARG125  | $0.58 \pm 0.01$ | $1.55 \pm 0.07$ | $1.29 \pm 0.06$ | $1.11 \pm 0.02$ | $1.02 \pm 0.01$ |
| ARG128  | $0.61 \pm 0.01$ | $1.53 \pm 0.07$ | $1.27 \pm 0.05$ | $1.10 \pm 0.01$ | $1.02 \pm 0.01$ |

Table S2: Hill coefficient  $n$  for all HEWL's basic residues at high salt concentration (0.200 M).

| Residue | $n$             |                       |                       |                      |                      |
|---------|-----------------|-----------------------|-----------------------|----------------------|----------------------|
|         | Free            | $a = 160 \text{ \AA}$ | $a = 120 \text{ \AA}$ | $a = 80 \text{ \AA}$ | $a = 40 \text{ \AA}$ |
| LYS1    | $0.96 \pm 0.01$ | $1.06 \pm 0.01$       | $1.04 \pm 0.01$       | $1.02 \pm 0.01$      | $1.01 \pm 0.01$      |
| ARG5    | $0.90 \pm 0.01$ | $0.98 \pm 0.01$       | $0.99 \pm 0.01$       | $0.99 \pm 0.01$      | $1.00 \pm 0.01$      |
| LYS13   | $0.87 \pm 0.01$ | $0.95 \pm 0.01$       | $0.95 \pm 0.01$       | $0.95 \pm 0.01$      | $0.96 \pm 0.01$      |
| ARG14   | $0.89 \pm 0.01$ | $0.95 \pm 0.01$       | $0.96 \pm 0.01$       | $0.96 \pm 0.01$      | $0.98 \pm 0.01$      |
| HIS15   | $0.99 \pm 0.01$ | $0.97 \pm 0.01$       | $0.96 \pm 0.01$       | $0.95 \pm 0.01$      | $0.93 \pm 0.01$      |
| ARG21   | $0.96 \pm 0.01$ | $1.00 \pm 0.01$       | $1.01 \pm 0.01$       | $1.02 \pm 0.01$      | $1.03 \pm 0.01$      |
| LYS33   | $0.91 \pm 0.01$ | $1.02 \pm 0.01$       | $1.01 \pm 0.01$       | $1.00 \pm 0.01$      | $1.00 \pm 0.01$      |
| ARG45   | $0.94 \pm 0.01$ | $1.00 \pm 0.01$       | $1.00 \pm 0.01$       | $1.01 \pm 0.01$      | $1.01 \pm 0.01$      |
| ARG61   | $0.86 \pm 0.01$ | $0.92 \pm 0.01$       | $0.93 \pm 0.01$       | $0.95 \pm 0.01$      | $0.97 \pm 0.01$      |
| ARG68   | $0.93 \pm 0.01$ | $0.97 \pm 0.01$       | $0.97 \pm 0.01$       | $0.98 \pm 0.01$      | $0.99 \pm 0.01$      |
| ARG73   | $0.89 \pm 0.01$ | $0.93 \pm 0.01$       | $0.94 \pm 0.01$       | $0.95 \pm 0.01$      | $0.97 \pm 0.01$      |
| LYS96   | $0.74 \pm 0.01$ | $0.81 \pm 0.01$       | $0.82 \pm 0.01$       | $0.83 \pm 0.01$      | $0.86 \pm 0.01$      |
| LYS97   | $0.77 \pm 0.01$ | $0.83 \pm 0.01$       | $0.84 \pm 0.01$       | $0.85 \pm 0.01$      | $0.88 \pm 0.01$      |
| ARG112  | $0.84 \pm 0.01$ | $0.91 \pm 0.01$       | $0.91 \pm 0.01$       | $0.92 \pm 0.01$      | $0.94 \pm 0.01$      |
| ARG114  | $0.85 \pm 0.01$ | $0.92 \pm 0.01$       | $0.92 \pm 0.01$       | $0.93 \pm 0.01$      | $0.95 \pm 0.01$      |
| LYS116  | $0.90 \pm 0.01$ | $0.96 \pm 0.01$       | $0.96 \pm 0.01$       | $0.95 \pm 0.01$      | $0.96 \pm 0.01$      |
| ARG125  | $0.90 \pm 0.01$ | $0.99 \pm 0.01$       | $0.99 \pm 0.01$       | $0.99 \pm 0.01$      | $1.00 \pm 0.01$      |
| ARG128  | $0.91 \pm 0.01$ | $0.99 \pm 0.01$       | $0.99 \pm 0.01$       | $0.99 \pm 0.01$      | $1.00 \pm 0.01$      |

## References

- [1] H. H. Chuang, *Align2mole*, <https://github.com/HHChuang/align2mole>, 2019.
